# Supplementary material
Source: PubMed Central journal article supplement (PMC1235818)
Supplement: jvirol_79_20_12674__1.pdf [file jvirol_79_20_12674__1.pdf]

**Supplementary Figure S1. (A)** SNPs/InDels identified in candidate genes. (\*) SNPs validated by our group only, (\*\*) SNPs validated by our and other groups at time of the study. ss-numbers refer to pending rs-numbers. **(B)** Chromosomal location of the candidate genes.

**(A)**

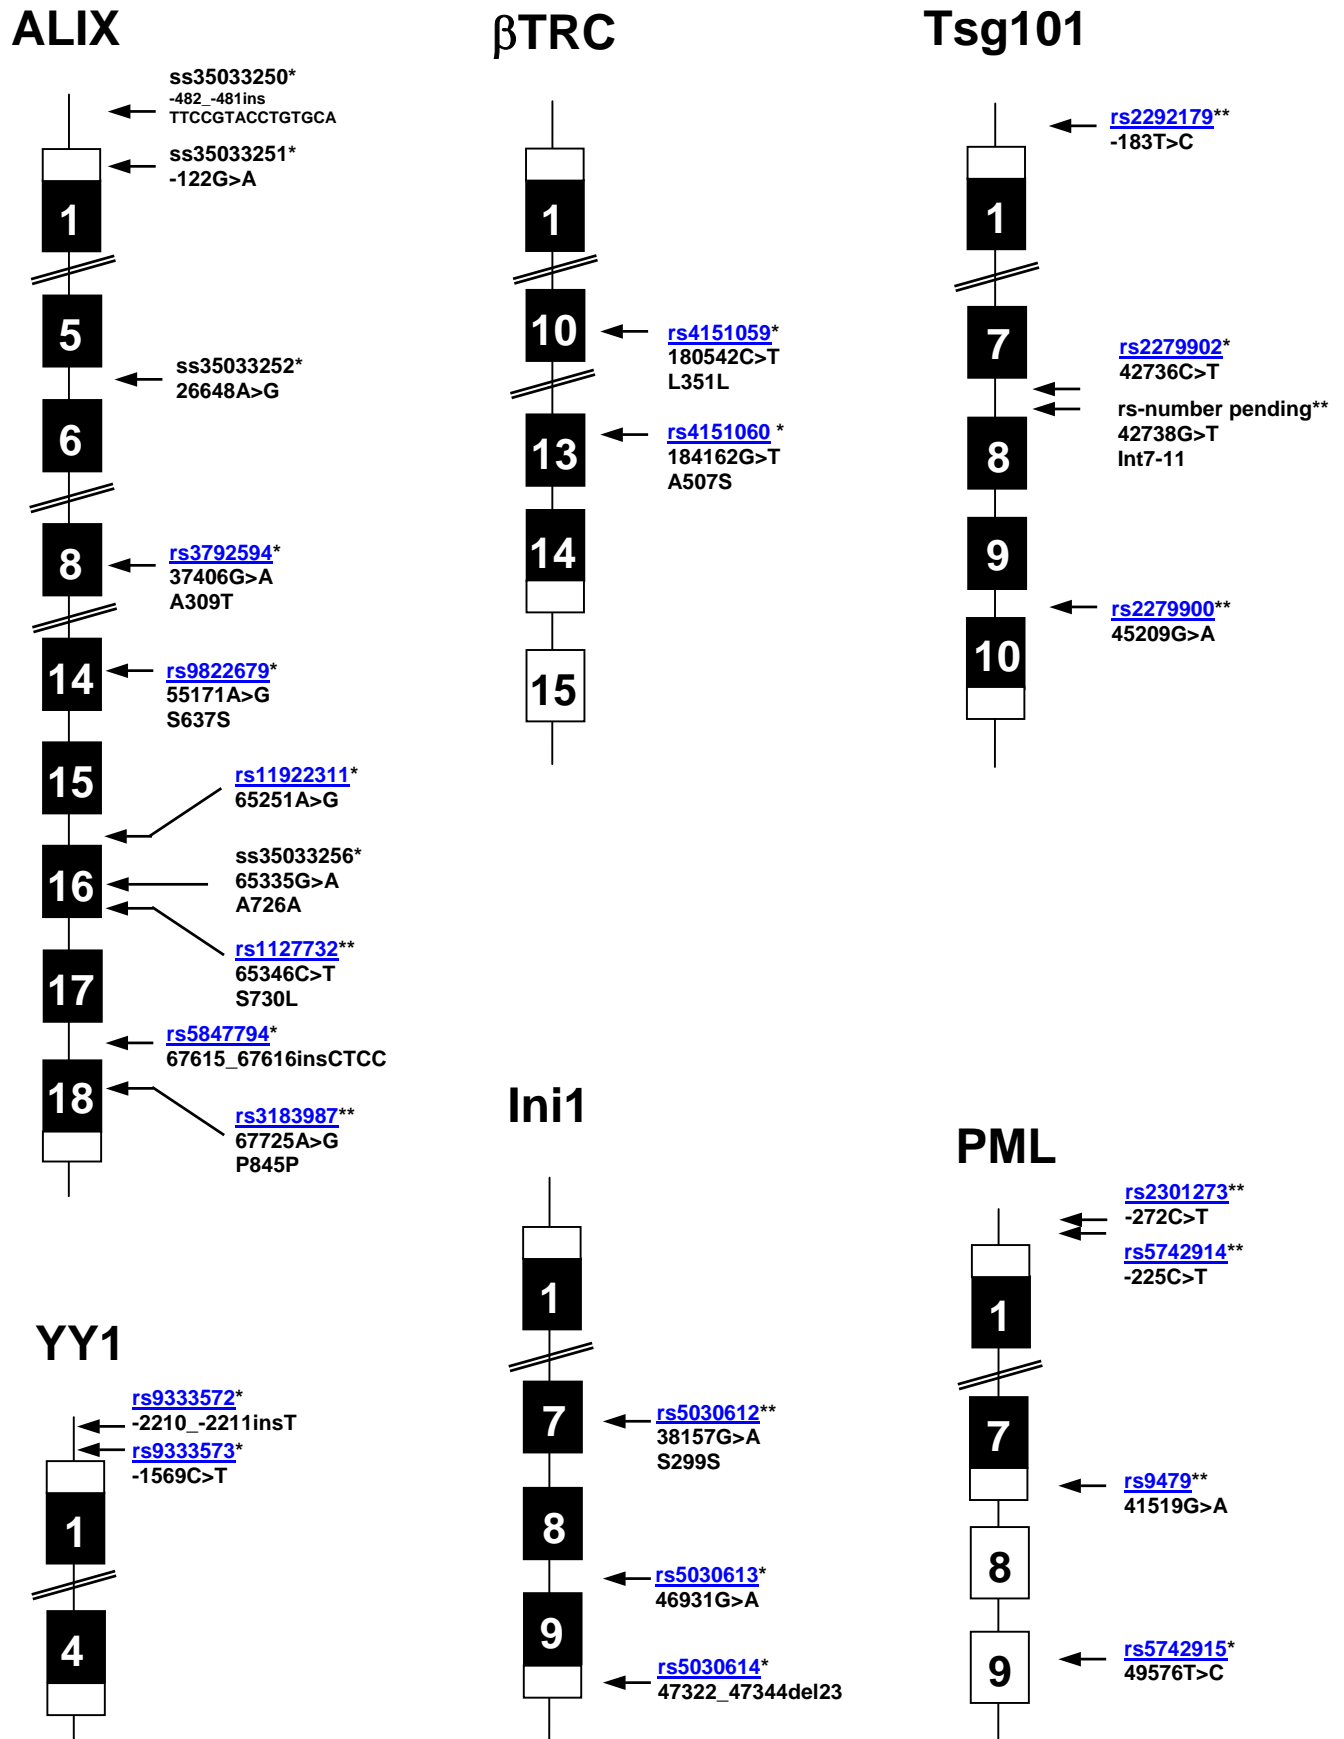

## Naf1

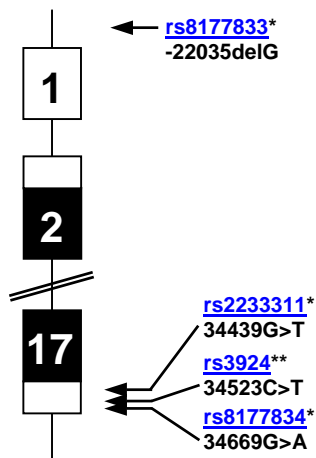

## PPIA

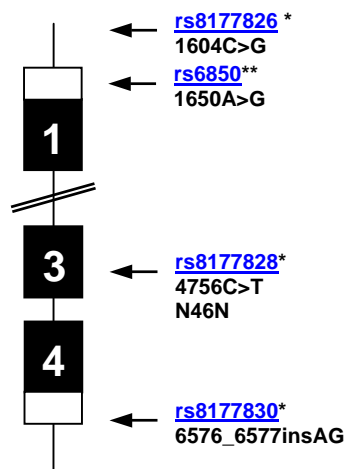

## HP68

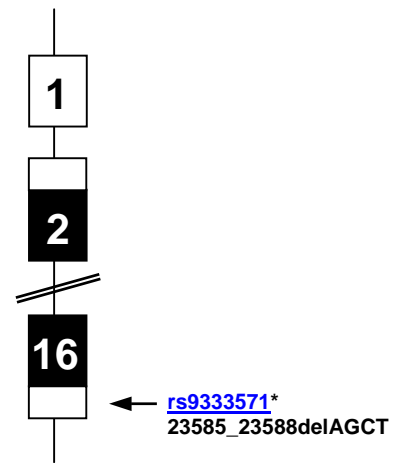

(B)

| Gene          | Human chromosomal location |
|---------------|----------------------------|
| <i>ALIX</i>   | 3p23                       |
| <i>βTRC</i>   | 10q24.32                   |
| <i>HP68</i>   | 4q31                       |
| <i>INII</i>   | 22q11.23                   |
| <i>NAF1</i>   | 5q32-q33.1                 |
| <i>PML</i>    | 15q22                      |
| <i>PPIA</i>   | 7p13-p11.2                 |
| <i>TSG101</i> | 11p15                      |
| <i>YY1</i>    | 14q                        |
