# Supplementary material
Source: PubMed Central journal article supplement (PMC1235818)
Supplement: jvirol_79_20_12674__2.pdf [file jvirol_79_20_12674__2.pdf]

**Supplementary Table S1.** Permissiveness in the *ex vivo* CD4 T cell system.  
 11: homozygous common allele, 12: heterozygous, 22: homozygous rare allele.

| Gene               | Polymorphism                    | rs-number  | Genotype | Absolute No. | %    | Allele frequency     | Permissiveness in pg p24/ml |                              |
|--------------------|---------------------------------|------------|----------|--------------|------|----------------------|-----------------------------|------------------------------|
|                    |                                 |            |          |              |      |                      | Per allele                  | Median (IQR)<br>Per genotype |
| <b>ALIX</b>        | -482_-481ins<br>TTCCGTACCTGTGCA | ss35033250 | 11       | 48           | 51   | 0.72                 | 89830 (37814-135170)        | 89830 (37814-135170)         |
|                    |                                 |            | 12       | 39           | 42   | 0.28                 | 70040 (39426-110650)        | 67580 (39293-112870)         |
|                    |                                 |            | 22       | 7            | 7    |                      |                             | 75000 (47163-96520)          |
|                    | -122G>A                         | ss35033251 | 11       | 31           | 69   | 0.84                 | 81595 (34402-140255)        | 81595 (34402-140255)         |
|                    |                                 |            | 12       | 14           | 31   | 0.16                 | 84230 (57643-153815)        | 84230 (57643-153815)         |
|                    |                                 |            | 22       | 0            | 0    |                      |                             | ---                          |
|                    | 26648A>G                        | ss35033252 | 11       | 10           | 53   | 0.68                 | 70871 (31822-150050)        | 70871 (31822-150050)         |
|                    |                                 |            | 12       | 6            | 31   | 0.32                 | 40450 (23110-92460)         | 39872 (12341-132225)         |
|                    |                                 |            | 22       | 3            | 16   |                      |                             | 57280                        |
|                    | A309T (37406G>A)                | rs3792594  | 11       | 18           | 38   | 0.66                 | 81595 (34402-141395)        | 81595 (34402-141395)         |
|                    |                                 |            | 12       | 26           | 55   | 0.34                 | 76000 (45524-135640)        | 84230 (42409-138895)         |
|                    |                                 |            | 22       | 3            | 7    |                      |                             | 57280                        |
|                    | S637S (55171A>G)                | rs9822679  | 11       | 18           | 38   | 0.66                 | 84700 (34402-141395)        | 84700 (34402-141395)         |
|                    |                                 |            | 12       | 26           | 55   | 0.34                 | 74590 (40450-113960)        | 75295 (39872-124800)         |
|                    |                                 |            | 22       | 3            | 7    |                      |                             | 57280                        |
|                    | 65251A>G                        | rs11922311 | 11       | 15           | 75   | 0.87                 | 102665 (32847-161705)       | 102665 (32847-161705)        |
|                    |                                 |            | 12       | 5            | 25   | 0.13                 | 57643 (55118-85983)         | 57643 (55118-85983)          |
|                    |                                 |            | 22       | 0            | 0    |                      |                             | ---                          |
|                    | A726A (65335G>A)                | ss35033256 | 11       | 19           | 95   | 0.97                 | 91300 (42987-154945)        | 91300 (42987-154945)         |
|                    |                                 |            | 12       | 1            | 5    | 0.03                 | 155670                      | 155670                       |
| 22                 |                                 |            | 0        | 0            |      |                      | ---                         |                              |
| S730L (65346C>T)   | rs1127732                       | 11         | 74       | 70           | 0.84 | 84700 (37543-135405) | 84700 (37543-135405)        |                              |
|                    |                                 | 12         | 29       | 28           | 0.16 | 76025 (49240-113370) | 79395 (49240-113915)        |                              |
|                    |                                 | 22         | 2        | 2            |      |                      | 56023                       |                              |
| 67615_67616insCTCC | rs5847794                       | 11         | 24       | 50           | 0.72 | 78490 (35053-138360) | 78490 (35053-138360)        |                              |
|                    |                                 | 12         | 21       | 44           | 0.28 | 84230 (42987-138895) | 92460 (42987-138895)        |                              |
|                    |                                 | 22         | 3        | 6            |      |                      | 57280                       |                              |
| P845P (67725A>G)   | rs3183987                       | 11         | 18       | 38           | 0.66 | 84700 (34402-141395) | 84700 (34402-141395)        |                              |
|                    |                                 | 12         | 27       | 56           | 0.34 | 75295 (42987-12480)  | 76000 (40450-135640)        |                              |
|                    |                                 | 22         | 3        | 6            |      |                      | 57280                       |                              |
| <b>βTRC</b>        | L351L (180542C>T)               | rs4151059  | 11       | 30           | 75   | 0.85                 | 73035 (38554-113915)        | 73035 (38554-113915)         |
|                    |                                 |            | 12       | 8            | 20   | 0.15                 | 65112 (3551-134770)         | 65112 (3551-12555)           |
|                    |                                 |            | 22       | 2            | 5    |                      |                             | 63476                        |
|                    | A507S (184162G>T)               | rs4151060  | 11       | 122          | 91   | 0.94                 | 90140 (41767-138930)        | 90140 (41767-13893)          |
|                    |                                 |            | 12       | 9            | 7    | 0.06                 | 46739 (35409-74485)         | 42541 (35409-68970)          |
|                    |                                 |            | 22       | 3            | 2    |                      |                             | 7047                         |
| <b>HP68</b>        | 23585_23588<br>delAGTC          | rs9333571  | 11       | 122          | 98   | 0.99                 | 87290 (41496-137000)        | 87290 (41496-137000)         |
|                    |                                 |            | 12       | 3            | 2    | 0.01                 | 36418                       | 36418                        |
|                    |                                 |            | 22       | 0            | 0    |                      |                             | ---                          |
| <b>INI1</b>        | S299S (38157G>A)                | rs5030612  | 11       | 41           | 85   | 0.93                 | 84700 (40450-138360)        | 84700 (40450-138360)         |
|                    |                                 |            | 12       | 7            | 15   | 0.07                 | 71574 (12341-130030)        | 71574 (12341-130030)         |
|                    |                                 |            | 22       | 0            | 0    |                      |                             | ---                          |
|                    | 46931G>A                        | rs5030613  | 11       | 39           | 81   | 0.91                 | 90140 (39132-140255)        | 90140 (39132-140255)         |
|                    |                                 |            | 12       | 9            | 19   | 0.09                 | 64478 (35414-95430)         | 64478 (35414-95430)          |
|                    |                                 |            | 22       | 0            | 0    |                      |                             | ---                          |
|                    | 47322_47344<br>del23            | rs5030614  | 11       | 29           | 61   | 0.77                 | 84315 (42409-143290)        | 84315 (42409-143290)         |
|                    |                                 |            | 12       | 16           | 33   | 0.23                 | 58391 (31627-100215)        | 62430 (31627-103165)         |
|                    |                                 |            | 22       | 3            | 6    |                      |                             | 49976 (22978-83736)          |
| <b>NAF1</b>        | -22035delG                      | rs8177833  | 11       | 83           | 85   | 0.92                 | 84700 (39167-123295)        | 84700 (39167-123295)         |
|                    |                                 |            | 12       | 14           | 14   | 0.08                 | 74590 (40450-125880)        | 71085 (38861-108010)         |
|                    |                                 |            | 22       | 1            | 1    |                      |                             | 164630                       |
|                    | 34439G>T                        | rs2233311  | 11       | 36           | 84   | 0.92                 | 74590 (34402-113915)        | 74590 (34402-113915)         |
|                    |                                 |            | 12       | 7            | 16   | 0.08                 | 84700 (39293-95430)         | 84700 (39293-95430)          |
|                    |                                 |            | 22       | 0            | 0    |                      |                             | ---                          |
|                    | 34523C>T                        | rs3924     | 11       | 36           | 84   | 0.92                 | 74590 (34402-113915)        | 74590 (34402-113915)         |
|                    |                                 |            | 12       | 7            | 16   | 0.08                 | 84700 (39293-95430)         | 84700 (39293-95430)          |
|                    |                                 |            | 22       | 0            | 0    |                      |                             | ---                          |
|                    | 34669G>A                        | rs8177834  | 11       | 36           | 84   | 0.92                 | 74590 (34402-113915)        | 74590 (34402-113915)         |
|                    |                                 |            | 12       | 7            | 16   | 0.08                 | 84700 (39293-95430)         | 84700 (39293-95430)          |
|                    |                                 |            | 22       | 0            | 0    |                      |                             | ---                          |
| <b>PML</b>         | -272C>T                         | rs2301273  | 11       | 46           | 96   | 0.98                 | 78490 (37814-138360)        | 78490 (37814-138360)         |
|                    |                                 |            | 12       | 2            | 4    | 0.02                 | 90582                       | 90582                        |
|                    |                                 |            | 22       | 0            | 0    |                      |                             | ---                          |
|                    | -225C>T                         | rs5742914  | 11       | 102          | 77   | 0.87                 | 89830 (46817-139500)        | 89830 (46817-139500)         |
|                    |                                 |            | 12       | 27           | 20   | 0.13                 | 74590 (35224-120050)        | 79495 (35782-130525)         |
|                    |                                 |            | 22       | 4            | 3    |                      |                             | 36698                        |
|                    | 41519A>G                        | rs9479     | 11       | 12           | 25   | 0.49                 | 84700 (25244-155670)        | 84700 (25244-155670)         |
|                    |                                 |            | 12       | 23           | 48   | 0.51                 | 77245 (39872-137000)        | 90140 (54999-137000)         |
|                    |                                 |            | 22       | 13           | 27   |                      |                             | 76000 (13138-129150)         |
|                    | F645L (49576T>C)                | rs5742915  | 11       | 10           | 22   | 0.53                 | 59470 (9349-124800)         | 59470 (9349-124800)          |

|               |                    |            |    |     |    |      |                        |                       |
|---------------|--------------------|------------|----|-----|----|------|------------------------|-----------------------|
|               |                    |            | 12 | 29  | 63 | 0.47 | 84700 (42409 -145720)  | 90140 (45524-138360)  |
|               |                    |            | 22 | 7   | 15 |      |                        | 66209 (29082 -160150) |
| <b>PPIA</b>   | 1604C>G            | rs8177826  | 11 | 116 | 88 | 0.94 | 85600 (41496-137000)   | 85600 (41496-137000)  |
|               |                    |            | 12 | 15  | 11 | 0.06 | 80500 (37814-120910)   | 79495 (36434-135160)  |
|               |                    |            | 22 | 1   | 1  |      |                        | 118320                |
|               | 1650A>G            | rs6850     | 11 | 94  | 70 | 0.84 | 72500 (39426-119615)   | 72500 (39426-119615)  |
|               |                    |            | 12 | 38  | 28 | 0.16 | 106455 (48230 -143450) | 106455 (41669-147080) |
|               |                    |            | 22 | 2   | 2  |      |                        | 112100                |
|               | N46N (4756C>T)     | rs8177828  | 11 | 46  | 96 | 0.98 | 78490 (39293-138360)   | 78490 (39293-138360)  |
|               |                    |            | 12 | 2   | 4  | 0.02 | 74462                  | 74462                 |
|               |                    |            | 22 | 0   | 0  |      |                        | ---                   |
|               | 6576_6577insAG     | rs8177830  | 11 | 87  | 65 | 0.8  | 72770 (39559-131250)   | 72770 (39559-131250)  |
|               |                    |            | 12 | 40  | 30 | 0.2  | 94425 (42409-138930)   | 96390 (45524-138360)  |
|               |                    |            | 22 | 7   | 5  |      |                        | 84700 (37814-139500)  |
| <b>Tsg101</b> | -183T>C            | rs2292179  | 11 | 108 | 81 | 0.90 | 92460 (49768 -140825)  | 92460 (49768 -140825) |
|               |                    |            | 12 | 24  | 18 | 0.10 | 42987 (28863-86390)    | 39850 (25851-90270)   |
|               |                    |            | 22 | 2   | 1  |      |                        | 52513                 |
|               | 42736C>T           | 2279902    | 11 | 30  | 64 | 0.81 | 100215 (62311-140255)  | 100215 (62311-140255) |
|               |                    |            | 12 | 16  | 34 | 0.19 | 52955 (26918-115535)   | 55118 (26918 -115535) |
|               |                    |            | 22 | 1   | 2  |      |                        | 45524                 |
|               | Int7-11 (42738G>T) | pending    | 11 | 128 | 98 | 0.99 | 80500 (39559-135640)   | 80500 (39559-135640)  |
|               |                    |            | 12 | 2   | 2  | 0.01 | 100185                 | 100185                |
|               |                    |            | 22 | 0   | 0  |      |                        | ---                   |
|               | 45209G>A           | rs2279900  | 11 | 11  | 48 | 0.70 | 81595 (19163-104150)   | 81595 (19163-104150)  |
|               |                    |            | 12 | 10  | 43 | 0.30 | 50336 (25851-114050)   | 55118 (25851-145655)  |
|               |                    |            | 22 | 2   | 9  |      |                        | 29359                 |
| <b>YY1</b>    | -2210_-2211insT    | rs9333572  | 11 | 92  | 96 | 0.98 | 78490 (39271-119615)   | 78490 (39271-119615)  |
|               |                    |            | 12 | 4   | 4  | 0.02 | 63822 (33203 -93110)   | 63822 (33203 -93110)  |
|               |                    |            | 22 | 0   | 0  |      |                        | ---                   |
|               | -1569C>T           | rs9333573  | 11 | 47  | 45 | 0.68 | 77775 (40005-122840)   | 77775 (40005-122840)  |
|               |                    |            | 12 | 46  | 45 | 0.32 | 88080 (45524-152960)   | 88080 (44033-148855)  |
|               |                    |            | 22 | 10  | 10 |      |                        | 90545 (47010-155335)  |
| <b>CCR5</b>   | Δ32                | rs333      | 11 | 109 | 81 | 0.9  | 85600 (40144-140255)   | 85600 (40144-140255)  |
|               |                    |            | 12 | 22  | 17 | 0.1  | 66001 (12167-111325)   | 72770 (37543 -119950) |
|               |                    |            | 22 | 3   | 2  |      |                        | 0.0                   |
|               | -59029G>A          | rs1799987  | 11 | 30  | 22 | 0.43 | 92460 (55480-141555)   | 92460 (55480-141555)  |
|               |                    |            | 12 | 56  | 42 | 0.57 | 78500 (39167 -128565)  | 77775 (38554-117155)  |
|               |                    |            | 22 | 48  | 36 |      |                        | 80500 (39167-152690)  |
| <b>CCR2</b>   | V64I (190G>A)      | rs17141036 | 11 | 111 | 83 | 0.91 | 87290 (46171-138930)   | 87290 (46171-138930)  |
|               |                    |            | 12 | 23  | 17 | 0.09 | 50936 (26257-118320)   | 50936 (26257-118320)  |
|               |                    |            | 22 | 0   | 0  |      |                        | ---                   |
| <b>CX3CR1</b> | T280M (839C>T)     | rs3732378  | 11 | 90  | 67 | 0.81 | 78870 (40005-130425)   | 78870 (40005-130425)  |
|               |                    |            | 12 | 38  | 28 | 0.19 | 88080 (39293 -144430)  | 89830 (39189 -150360) |
|               |                    |            | 22 | 6   | 5  |      |                        | 60244 (39543-127820)  |
| <b>IL4</b>    | -589C>T            | rs2243250  | 11 | 101 | 78 | 0.89 | 83220 (39271-134805)   | 83220 (39271-134805)  |
|               |                    |            | 12 | 27  | 21 | 0.11 | 84165 (51946-135405)   | 89830 (50936-135640)  |
|               |                    |            | 22 | 1   | 1  |      |                        | 52955                 |
| <b>MIP1α</b>  | 459C>T             | rs1719134  | 11 | 85  | 64 | 0.78 | 80115 (39543-133210)   | 80115 (39543-133210)  |
|               |                    |            | 12 | 38  | 29 | 0.22 | 87850 (41496-140825)   | 91730 (40005-140825)  |
|               |                    |            | 22 | 10  | 7  |      |                        | 78775 (43207-162575)  |
| <b>Rantes</b> | -403G>A            | rs2107538  | 11 | 86  | 67 | 0.81 | 76525 (40005-119160)   | 76525 (40005-119160)  |
|               |                    |            | 12 | 36  | 28 | 0.19 | 93945 (39565-152540)   | 95430 (42681-157910)  |
|               |                    |            | 22 | 7   | 5  |      |                        | 78500 (16805 -149410) |
|               | -28C>G             | rs2280788  | 11 | 127 | 98 | 0.99 | 81740 (39837 -135170)  | 81740 (39837 -135170) |
|               |                    |            | 12 | 3   | 2  | 0.01 | 81802                  | 81802                 |
|               |                    |            | 22 | 0   | 0  |      |                        | ---                   |
|               | In1.1 (375T>C)     | rs2280789  | 11 | 101 | 75 | 0.85 | 73680 (39167-117155)   | 73680 (39167-117155)  |
|               |                    |            | 12 | 27  | 20 | 0.15 | 113250 (62012-166070)  | 110610 (66012-166070) |
|               |                    |            | 22 | 6   | 5  |      |                        | 125680 (51872-173870) |
