# Supplementary material
Source: PubMed Central journal article supplement (PMC1235818)
Supplement: jvirol_79_20_12674__3.pdf [file jvirol_79_20_12674__3.pdf]

## Supplemental Table S2. Association of genetic variants with disease progression *in vivo*.

Estimates of CD4 T cell gradient offsets and time in years from CD4 to decline from 500 to 200 cells/mm<sup>3</sup>. (A) by genotype or haplotype, (B) by carrier status. 11=homozygous common allele, 12=heterozygous, 22=homozygous rare allele. Obs= observations.

### A

| gene               | obs | alleles/<br>haplotypes | gradient<br>offset | 95%<br>CI | Wald<br>test p | Time in years for CD4<br>to decline from 500 to 200 |     |
|--------------------|-----|------------------------|--------------------|-----------|----------------|-----------------------------------------------------|-----|
| CCR5 -59029A       | 196 | 11                     |                    |           |                | 3.8                                                 |     |
|                    | 402 | 12                     | 0.01               | -0.29     | 0.32           | 0.93                                                | 3.9 |
|                    | 223 | 22                     | -0.20              | -0.55     | 0.14           | 0.25                                                | 3.5 |
| CCR5 d32           | 713 | 11                     |                    |           |                | 3.7                                                 |     |
|                    | 133 | 12                     | 0.33               | 0.03      | 0.62           | 0.03                                                | 4.3 |
| CCR2 64I           | 686 | 11                     |                    |           |                | 3.6                                                 |     |
|                    | 149 | 12                     | 0.32               | 0.03      | 0.62           | 0.03                                                | 4.2 |
|                    | 9   | 22                     | -0.61              | -1.81     | 0.58           | 0.32                                                | 2.9 |
| CX3CR1 280M        | 623 | 11                     |                    |           |                | 3.8                                                 |     |
|                    | 199 | 12                     | -0.19              | -0.46     | 0.09           | 0.18                                                | 3.5 |
|                    | 25  | 22                     | -0.14              | -0.91     | 0.62           | 0.71                                                | 3.6 |
| RANTES -403A       | 568 | 11                     |                    |           |                | 3.7                                                 |     |
|                    | 243 | 12                     | 0.03               | -0.24     | 0.29           | 0.84                                                | 3.8 |
|                    | 31  | 22                     | -0.16              | -0.75     | 0.43           | 0.59                                                | 3.5 |
| RANTES -28G        | 811 | 11                     |                    |           |                | 3.7                                                 |     |
|                    | 33  | 12                     | 0.42               | -0.17     | 1.00           | 0.16                                                | 4.6 |
|                    | 0   | 22                     |                    |           |                |                                                     |     |
| RANTES In1.1       | 633 | 11                     |                    |           |                | 3.7                                                 |     |
|                    | 202 | 12                     | 0.11               | -0.16     | 0.38           | 0.41                                                | 3.9 |
|                    | 11  | 22                     | 0.44               | -0.36     | 1.25           | 0.28                                                | 4.6 |
| RANTES Haplotypes* | 570 | 1                      |                    |           |                | 3.7                                                 |     |
|                    | 242 | 2                      | -0.03              | -0.29     | 0.23           | 0.83                                                | 3.7 |
|                    | 33  | 3                      | 0.41               | -0.18     | 0.99           | 0.18                                                | 4.6 |
| MIP1a 459T         | 454 | 11                     |                    |           |                | 3.8                                                 |     |
|                    | 332 | 12                     | -0.04              | -0.29     | 0.20           | 0.72                                                | 3.7 |
|                    | 55  | 22                     | -0.36              | -0.82     | 0.10           | 0.13                                                | 3.3 |
| IL4 589T           | 586 | 11                     |                    |           |                | 3.8                                                 |     |
|                    | 213 | 12                     | -0.13              | -0.42     | 0.15           | 0.36                                                | 3.6 |
|                    | 46  | 22                     | -0.26              | -0.8      | 0.27           | 0.33                                                | 3.4 |
| IL10 -3575A        | 365 | 11                     |                    |           |                | 3.6                                                 |     |
|                    | 382 | 12                     | 0.04               | -0.21     | 0.30           | 0.74                                                | 3.7 |
|                    | 90  | 22                     | 0.22               | -0.16     | 0.59           | 0.25                                                | 4.0 |
| IL10 -592A         | 471 | 11                     |                    |           |                | 3.7                                                 |     |
|                    | 300 | 12                     | 0.00               | -0.25     | 0.25           | 0.99                                                | 3.7 |
|                    | 67  | 22                     | 0.05               | -0.41     | 0.50           | 0.84                                                | 3.8 |
| SDF1 3'A           | 564 | 11                     |                    |           |                | 3.8                                                 |     |
|                    | 236 | 12                     | -0.27              | -0.55     | 0.01           | 0.06                                                | 3.4 |
|                    | 30  | 22                     | -0.08              | -0.71     | 0.55           | 0.80                                                | 3.7 |
| PML -225T          | 709 | 11                     |                    |           |                | 3.8                                                 |     |
|                    | 125 | 12                     | -0.21              | -0.53     | 0.11           | 0.20                                                | 3.4 |
|                    | 9   | 22                     | -0.33              | -1.48     | 0.82           | 0.58                                                | 3.3 |
| PPIA 1604G         | 732 | 11                     |                    |           |                | 3.7                                                 |     |
|                    | 109 | 12                     | 0.07               | -0.27     | 0.41           | 0.67                                                | 3.9 |
|                    | 5   | 22                     | -0.72              | -2.34     | 0.90           | 0.38                                                | 2.8 |
| PPIA 1650G         | 620 | 11                     |                    |           |                | 3.9                                                 |     |
|                    | 201 | 12                     | -0.25              | -0.54     | 0.03           | 0.08                                                | 3.5 |
|                    | 25  | 22                     | -0.72              | -1.64     | 0.20           | 0.13                                                | 2.9 |
| PPIA haplotypes**  | 1   | 530                    |                    |           |                | 4.0                                                 |     |
|                    | 2   | 203                    | -0.41              | -0.71     | -0.11          | 0.01                                                | 3.3 |
|                    | 3   | 114                    | -0.07              | -0.42     | 0.27           | 0.67                                                | 3.8 |
| TSG101 -183C       | 625 | 11                     |                    |           |                | 3.9                                                 |     |
|                    | 202 | 12                     | -0.27              | -0.55     | 0.01           | 0.06                                                | 3.4 |
|                    | 22  | 22                     | -0.62              | -1.43     | 0.19           | 0.13                                                | 3.0 |
| bTRC 507S          | 781 | 11                     |                    |           |                | 3.7                                                 |     |
|                    | 67  | 12                     | 0.01               | -0.45     | 0.46           | 0.98                                                | 3.7 |
|                    | 3   | 22                     | 0.96               | -3.95     | 5.87           | 0.70                                                | 6.6 |

Modelled square root CD4 as a linear function of time, adjusted for sex,age, IDU  
gradient offset is difference of gradient compared to homozygous common allele ie group=11  
genetic group only modifies gradient not intercept, RE at patient level for gradient offset, except where noted

RANTES haplotypes\*

1= Reference

2=-403A and In1.1 carrying haplotypes

3=-28G carrying haplotypes

PPIA haplotypes\*\*

1=Reference

2=1650G carrying haplotypes

3=1604G carrying haplotypes

**B**

| gene         | obs | alleles   | gradient<br>offset | 95%   | CI    | Wald<br>test p | Time in years for CD4<br>to decline from 500 to 200 |
|--------------|-----|-----------|--------------------|-------|-------|----------------|-----------------------------------------------------|
| CCR5 -59029A | 196 | 11        |                    |       |       |                | 3.8                                                 |
|              | 625 | 12 and 22 | -0.06              | -0.35 | 0.23  | 0.67           | 3.7                                                 |
| CCR5 d32     | 713 | 11        |                    |       |       |                | 3.7                                                 |
|              | 133 | 12        | 0.33               | 0.04  | 0.62  | 0.03           | 4.3                                                 |
| CCR2 64I     | 686 | 11        |                    |       |       |                | 3.7                                                 |
|              | 158 | 12 and 22 | 0.28               | -0.01 | 0.56  | 0.06           | 4.2                                                 |
| CX3CR1 280M  | 623 | 11        |                    |       |       |                | 3.8                                                 |
|              | 224 | 12 and 22 | -0.18              | -0.45 | 0.08  | 0.18           | 3.5                                                 |
| RANTES -403A | 568 | 11        |                    |       |       |                | 3.7                                                 |
|              | 274 | 12 and 22 | 0.01               | -0.24 | 0.26  | 0.94           | 3.7                                                 |
| RANTES -28G  | 811 | 11        |                    |       |       |                | 3.7                                                 |
|              | 33  | 12        | 0.42               | -0.17 | 1     | 0.16           | 4.6                                                 |
| RANTES In1.1 | 633 | 11        |                    |       |       |                | 3.7                                                 |
|              | 213 | 12 and 22 | 0.13               | -0.14 | 0.39  | 0.35           | 3.9                                                 |
| MIP1a 459T   | 454 | 11        |                    |       |       |                | 3.8                                                 |
|              | 387 | 12 and 22 | -0.09              | -0.33 | 0.15  | 0.47           | 3.7                                                 |
| IL4 589T     | 586 | 11        |                    |       |       |                | 3.8                                                 |
|              | 259 | 12 and 22 | -0.17              | -0.43 | 0.09  | 0.21           | 3.6                                                 |
| IL10 -3575A  | 365 | 11        |                    |       |       |                | 3.6                                                 |
|              | 472 | 12 and 22 | 0.08               | -0.16 | 0.32  | 0.51           | 3.8                                                 |
| IL10 -592A   | 471 | 11        |                    |       |       |                | 3.7                                                 |
|              | 367 | 12 and 22 | 0.01               | -0.22 | 0.25  | 0.91           | 3.8                                                 |
| SDF1 3'A     | 564 | 11        |                    |       |       |                | 3.9                                                 |
|              | 266 | 12 and 22 | -0.26              | -0.53 | 0     | 0.05           | 3.4                                                 |
| PML -225T    | 709 | 11        |                    |       |       |                | 3.8                                                 |
|              | 134 | 12 and 22 | -0.22              | -0.53 | 0.09  | 0.17           | 3.5                                                 |
| PPIA 1604G   | 732 | 11        |                    |       |       |                | 3.7                                                 |
|              | 114 | 12 and 22 | 0.03               | -0.3  | 0.37  | 0.86           | 3.8                                                 |
| PPIA 1650G   | 620 | 11        |                    |       |       |                | 3.9                                                 |
|              | 226 | 12 and 22 | -0.32              | -0.6  | -0.04 | 0.02           | 3.4                                                 |
| TSG101 -183C | 625 | 11        |                    |       |       |                | 3.9                                                 |
|              | 224 | 12 and 22 | -0.30              | -0.57 | -0.03 | 0.03           | 3.4                                                 |
| bTRC 507S    | 781 | 11        |                    |       |       |                | 3.7                                                 |
|              | 70  | 12 and 22 | 0.02               | -0.44 | 0.47  | 0.95           | 3.7                                                 |
